# Supplementary material for: Large extraordinary refractive index in highly birefringent nematic liquid crystals of dinaphthyldiacetylene-based materials
Source: Royal Society of Chemistry journal article supplement (doi:10.1039/c3tc30640b), 2013-01-01
Supplement: c3tc30640b.pdf [file c3tc30640b.pdf]

## Supporting Information

### Large extraordinary refractive index in highly birefringent nematic liquid crystals of dinaphthyldiacetylene-based materials

Sungmin Kang,\* Shunpei Nakajima, Yuki Arakawa, Gen-ichi Konishi\* and Junji Watanabe

Department of Organic and Polymeric Materials, Tokyo Institute of Technology, Ookayama, Meguro-ku, Tokyo 152-8552, Japan

#### Derivation of equation (1)

Assuming that the materials are isotropic and have no absorption, the transmitted wave amplitude,  $E_t$  and intensity,  $I_t$  can be given by

$$E_t = E_0 e^{i\omega t} \left( \frac{tt'}{1 - r^2 e^{-i\delta}} \right) \quad (1)'$$

$$I_t = I_i \frac{(tt')^2}{(1 + r^4) - 2r^2 \cos \delta} \quad (2)'$$

where  $I_i$ ,  $E_0$ ,  $r$ ,  $t$  and  $\delta$  refer the intensity of incident wave, the amplitude of incident wave, the reflection amplitude coefficient, the transmission amplitude coefficient and the phase difference, respectively. Furthermore,  $t$  and  $t'$  are the fraction of transmission amplitude coefficients entering into the material and the fraction transmitted when a wave leaves the material, respectively. (Here, in the derivation of equation (1)', a common factor of  $e^{-i\delta^2}$  is omitted because we are interested in the irradiance. Moreover, a phase difference of  $\pi/2$  between the reflected and transmitted waves are also ignored.) At condition of normal incidence, the reflection amplitude coefficient,  $r$  can be written as

$$r = \frac{n_1 - n_2}{n_1 + n_2} \quad (3)'$$

where  $n_1$  and  $n_2$  are the refractive indices of the glass cell and LC material, respectively.

By using  $\cos\delta = 1 - 2\sin^2(\delta/2)$ ,  $tt' + r = 1$  and  $\delta = 4\pi n_2 d/\lambda$ , equation (2)' can be expressed as

$$\frac{I_t}{I_i} = \frac{1}{1 + \left[ \frac{2r}{1-r^2} \right]^2 \sin^2\left(\frac{\delta}{2}\right)} = \frac{1}{1 + \left( \frac{n_1^2 - n_2^2}{2n_1 n_2} \right)^2 \sin^2\left(\frac{\delta}{2}\right)} \cong 1 - \left( \frac{n_1^2 - n_2^2}{2n_1 n_2} \right)^2 \sin^2\left(\frac{2\pi}{\lambda} n_2 d\right) \quad (4)'$$

where  $d$  and  $\lambda$  refer thickness of LC media and wavelength of incident light, respectively.
